# Supplementary material for: Human trafficking among Ethiopian returnees: its magnitude and risk factors
Source: Springer Nature journal article supplement (doi:10.1186/s12889-019-6395-z), 2019-01-22
Supplement: MOESM2 [file 16412668]

## General information

1. ID Number of the respondent \_\_\_\_\_
2. Date of interview \_\_\_\_\_
3. Place of interview: a. Metemma Yohannes  
b. Moyale  
c. Galafi
4. Interviewer's name \_\_\_\_\_  
Signature \_\_\_\_\_ Date \_\_\_\_\_
5. Supervisor name \_\_\_\_\_  
Signature \_\_\_\_\_ Date \_\_\_\_\_

| Part I. Socio Demographic and behavioral Characteristics of participants |                                                                                                                                                                                                                                                                                                                                                                                                                                                                                           |                                                                                                                                                                                                                                                                                      |
|--------------------------------------------------------------------------|-------------------------------------------------------------------------------------------------------------------------------------------------------------------------------------------------------------------------------------------------------------------------------------------------------------------------------------------------------------------------------------------------------------------------------------------------------------------------------------------|--------------------------------------------------------------------------------------------------------------------------------------------------------------------------------------------------------------------------------------------------------------------------------------|
| S.No                                                                     | Questions                                                                                                                                                                                                                                                                                                                                                                                                                                                                                 | Response                                                                                                                                                                                                                                                                             |
| 1.1                                                                      | Age at the time of departure                                                                                                                                                                                                                                                                                                                                                                                                                                                              | _____                                                                                                                                                                                                                                                                                |
| 1.2                                                                      | Sex                                                                                                                                                                                                                                                                                                                                                                                                                                                                                       | 1. Male      2. Female                                                                                                                                                                                                                                                               |
| 1.3                                                                      | Religion                                                                                                                                                                                                                                                                                                                                                                                                                                                                                  | 1. Orthodox                      3. Protestant      5. Other specify _____<br>2. Muslim                        4. Catholic                                                                                                                                                           |
| 1.4                                                                      | Marital Status                                                                                                                                                                                                                                                                                                                                                                                                                                                                            | 1. Married    2. Never married    3. Divorced    4. Widowed                                                                                                                                                                                                                          |
| 1.5                                                                      | Ethnicity                                                                                                                                                                                                                                                                                                                                                                                                                                                                                 | 1. Amhara    3. SNNP      5. Somali<br>2. Oromo    4. Tigrie      6. Other (specify) _____                                                                                                                                                                                           |
| 1.6                                                                      | Educational status                                                                                                                                                                                                                                                                                                                                                                                                                                                                        | 1. Do not read and write    4. Junior (7 <sup>th</sup> -8 <sup>th</sup> )      7. Certificate<br>2. Informal education      5. High sch. (9 <sup>th</sup> – 10 <sup>th</sup> )    8. Diploma<br>3. Primary Education      6. Preparatory              9. Degree & above              |
| 1.7                                                                      | Former residence                                                                                                                                                                                                                                                                                                                                                                                                                                                                          | 1. Rural      2. Urban                                                                                                                                                                                                                                                               |
| 1.8                                                                      | Former place of residence<br>(Place where you live just before departure due to trafficking)                                                                                                                                                                                                                                                                                                                                                                                              | 1. Region _____      Woreda _____<br>2. Zone _____      City/town/kebele _____                                                                                                                                                                                                       |
| 1.9                                                                      | At the time of departure, were your parents alive?                                                                                                                                                                                                                                                                                                                                                                                                                                        | 1. Yes, both alive              3. Father only<br>2. Mother only                4. Both not alive                                                                                                                                                                                    |
| 1.10                                                                     | Your own former occupation (if you were independent of your parents)                                                                                                                                                                                                                                                                                                                                                                                                                      | 1. Job seeker                      6. Farming (own or for family)<br>2. Student/ with parents      7. Trade (own or for family)<br>3. Daily laborer                8. Service (own or for family)<br>4. Work for private firms      9. Other (specify) _____<br>5. Government worker |
| 1.11                                                                     | Major means of income for your parents                                                                                                                                                                                                                                                                                                                                                                                                                                                    | 1. No parent or care taker    4. Government employee    7. Manufacturing<br>2. Farmer                        5. Trade                        8. Other (specify) _____<br>3. Work for private firms    6. Service                                                                     |
| Trafficking and smuggling status of respondents                          |                                                                                                                                                                                                                                                                                                                                                                                                                                                                                           |                                                                                                                                                                                                                                                                                      |
| 1.12.1                                                                   | <b>To data collector:</b> See Question. 1.1 above and check whether the respondent was a child (under 18) during departure. If he/she was a child, ask whether he/she was in an exploitive condition (such as forced labor & services, sex wok, or child soldering) or entering into such a condition.                                                                                                                                                                                    | 1. Yes<br>2. No                                                                                                                                                                                                                                                                      |
| 1.12.2                                                                   | If you were not a child at departure, how did you enter into the migration process and what were the conditions after departure?<br><b>To data collector:</b> ask whether the returnee was deceived, fraud, cheated or coerced by anyone immediately before or after departure, and was in an exploitive condition (such as forced labor & services, sex wok, or was in military force) or was entering into a similar condition. If positive, choose code 1 (Yes), otherwise code 2 (No) | 1. Yes<br>2. No                                                                                                                                                                                                                                                                      |
| 1.12.3                                                                   | <b>To data collector:</b> See the answer for question number 1.12.1 and 1.12.2. If at least one is “Yes”, then the interviewee was a victim of human trafficking. Based on this definition, was he/she trafficked?                                                                                                                                                                                                                                                                        | 1. Yes<br>2. No                                                                                                                                                                                                                                                                      |
| 1.13                                                                     | Was a returnee smuggled during traveling?<br><b>To data collector:</b> Check whether the returnee crossed boundaries of neighboring countries illegally (without visa) with voluntary transaction.                                                                                                                                                                                                                                                                                        | 1. Yes<br>2. No                                                                                                                                                                                                                                                                      |

| Part II: Other characteristics of participants |                                                                                                                                                               |                                                                                                                                                                                                                                                                                                         |
|------------------------------------------------|---------------------------------------------------------------------------------------------------------------------------------------------------------------|---------------------------------------------------------------------------------------------------------------------------------------------------------------------------------------------------------------------------------------------------------------------------------------------------------|
| Se. No                                         | Questions                                                                                                                                                     | Responses                                                                                                                                                                                                                                                                                               |
| 2.1                                            | The corridor you travelled in during trafficking                                                                                                              | 1. Metemma      3. Galafi      5. Bole<br>2. Moyale      4. Jijiga      6. Other (specify)_____                                                                                                                                                                                                         |
| 2.2                                            | Who initiated/ recruited into migration/                                                                                                                      | 1. Parents      4. Colleagues      7. Family from abroad<br>2. Other relatives      5. Friend      8. Others (specify)<br>3. Neighbors      6. People from abroad                                                                                                                                       |
| 2.3                                            | Do each of the following event happened before departure? If it was positive, write code "1", else code "2". Note: if there was natural disaster, specify it. | 1. Conflict in your surroundings/village _____<br>2. Conflict in your family _____<br>3. Political instability _____<br>4. Economic crisis _____<br>5. Natural disaster _____<br>→ Type of disaster: a) Draught    b) Flood    c) other(specify)___                                                     |
| 2.4                                            | Check whether each of the following event happened? If it was positive, write code "1", else code "2".                                                        | 1. Family or yourself were under credit pressure _____<br>2. Denay of your money by traffickers after departure _____<br>3. Falling in debit bondage by traffickers _____<br>4. Forced to pay money by securities during traveling _____<br>5. Forced to pay money by securities during detention _____ |
| 2.5                                            | If you were migrant before starting moving abroad, where it was and for what purpose?                                                                         | 1. Was not migrant<br>2. Around border areas seeking job<br>3. Region/zone/district center seeking job<br>4. Addis Ababa seeking job<br>5. Region/zone/district for education<br>6. Other (specify)_____                                                                                                |
| 2.6                                            | Were you a victim of human trafficking before?                                                                                                                | 1. Yes<br>2. No                                                                                                                                                                                                                                                                                         |
| 2.7                                            | <b>Only to Females:</b> Were you forced to marry someone before departure?                                                                                    | 1. Yes<br>2. No                                                                                                                                                                                                                                                                                         |
| 2.8                                            | How frequent do you use alcohol <b>before</b> and <b>after</b> your departure? (Select among 1-5 and write the code on each it applies more)                  | 1. Before: _____<br>2. After: _____<br>1. I never use alcohol<br>2. Rarely<br>3. 1-4 per week<br>4. Daily<br>5. Others (specify)_____                                                                                                                                                                   |
| 2.9                                            | How frequent do you use drugs other than alcohol <b>before</b> and <b>after</b> your departure? (Select among 1-5 and write the code on each it applies more) | 3. Before: _____<br>4. After: _____<br>1. Never → go to 2.12<br>2. Rarely<br>3. 1-4 per week<br>4. Daily<br>5. Others (specify)_____                                                                                                                                                                    |
| 2.10                                           | If you were experienced the use of any drug, write the codes in order of frequency                                                                            | 5. Before: ___ ___ ___<br>6. After: ___ ___ ___<br>1. Kaht    4. Hashish<br>2. Cigar    5. Syringe<br>3. Shisha    6. Other(Specify)_____                                                                                                                                                               |
| 2.11                                           | Had you ever been forced to use any drug by your traffickers (exploiter)?                                                                                     | 1. Never<br>2. Yes, substance<br>3. Yes, Alcohol<br>4. Both alcohol and other drugs                                                                                                                                                                                                                     |
| 2.12                                           | Had ever been detained/prisoned while you were abroad?                                                                                                        | 1. Never<br>2. Yes, in IOM Camp (_____ weeks)<br>3. Yes, in Government prisons (_____ weeks)<br>4. Others (Specify)_____ (_____ weeks)                                                                                                                                                                  |

|                                                        |                                                                                                     |                                                                     |                                                                                                                |                                              |
|--------------------------------------------------------|-----------------------------------------------------------------------------------------------------|---------------------------------------------------------------------|----------------------------------------------------------------------------------------------------------------|----------------------------------------------|
| 2.13                                                   | At the time of departure, which country was your initial planned destination?                       | 1. Sudan<br>2. Djibouti<br>3. Kenya                                 | 4. Europe<br>5. South Africa<br>6. Other Arab countries                                                        | 7. Other (specify)_____                      |
| 2.14                                                   | What is the main reason for your return now?                                                        | 1. Deportation<br>2. Conflict<br>3. Visit Family<br>4. No job there | 5. Discomfort with my job<br>6. Strict control of borders<br>7. Robe by traffickers<br>8. Insufficient payment | 9. Health problem<br>10. Other(specify)_____ |
| <b>Other social support related questions (OSLO-3)</b> |                                                                                                     |                                                                     |                                                                                                                |                                              |
| 2.15                                                   | How many people are you so close to that you can count on them if you have great personal problems? | 1. None<br>2. 1-2<br>3. 3-5<br>4. 5 and above                       |                                                                                                                |                                              |
| 2.16                                                   | How much interest and concern do people show in what you do?                                        | 1. Very little<br>2. Little                                         | 3. Uncertain<br>4. Some                                                                                        | 5. A lot                                     |
| 2.17                                                   | How easy is it to get practical help from neighbors if you should need it?                          | 1. Very difficult<br>2. Difficult                                   | 3. Possible<br>4. Easy                                                                                         | 5. Very easy                                 |

| <b>Part III: A simple poverty scorecard</b> |                                                                            |                                                                                                                                            |                     |               |
|---------------------------------------------|----------------------------------------------------------------------------|--------------------------------------------------------------------------------------------------------------------------------------------|---------------------|---------------|
| S. N                                        | Questions                                                                  | Responses                                                                                                                                  |                     |               |
| 3.1                                         | How many people are in the household?                                      | 1. Six or more<br>2. Five                                                                                                                  | 3. Four<br>4. Three | 5. Two or one |
| 3.2                                         | Do all children ages 6 to 12 attend school?                                | 1. Yes    2. No    3. No child aged 6 to 12                                                                                                |                     |               |
| 3.3                                         | Excluding kitchen and toilets, how many rooms does the dwelling unit have? | 1. One    2. Two    3. Three or more                                                                                                       |                     |               |
| 3.4                                         | What is the main construction material of the walls of the dwelling unit?  | 1. Wood and grass, mud and stone, or other<br>2. Wood and mud, reeds and bamboo, cement and stone, hollow blocks. or bricks                |                     |               |
| 3.5                                         | What type of toilet facility does the household use?                       | 1. Pit latrine (shared), field/forest, container, etc<br>2. Pit latrine (private)<br>3. Flush toilet (shared)<br>4. Flush toilet (private) |                     |               |
| 3.6                                         | What is the main source of cooking fuel?                                   | 1. Firewood (purchase or collected), animal dung<br>2. Crop residue<br>3. Charcoal, kerosene, butane gas, electricity                      |                     |               |
| 3.7                                         | Does the household currently own any mattresses and/or beds?               | 1. Yes<br>2. No                                                                                                                            |                     |               |
| 3.8                                         | Does the household currently own any radio?                                | 1. Yes    2. No                                                                                                                            |                     |               |
| 3.9                                         | Does the household currently own any watches?                              | 1. Yes    2. No                                                                                                                            |                     |               |
| 3.10                                        | Does the household currently own any cattle, sheep, or goats?              | 1. Yes    2. No                                                                                                                            |                     |               |
| 3.11                                        | Does the household currently own any jewelry (gold/silver)?                | 1. Yes    2. No                                                                                                                            |                     |               |

| <b>Part IV: Puling Factors for Human Trafficking</b> |                                                                                      |                 |
|------------------------------------------------------|--------------------------------------------------------------------------------------|-----------------|
| <b>SN</b>                                            | <b>Question (Considering the situations before departure)</b>                        | <b>Response</b> |
| 4.1                                                  | Were you interested by the glamour and anonymity of city life?                       | 1. Yes 2. No    |
| 4.2                                                  | Were you hoping for future love, fame, success?                                      | 1. Yes 2. No    |
| 4.3                                                  | Had you been seduced by your friend or colleague showing life oversea is attractive? | 1. Yes 2. No    |
| 4.4                                                  | Were there any promises made by others to attract you and leave home?                | 1. Yes 2. No    |
| 4.5                                                  | Was there any deception of job promises abroad?                                      | 1. Yes 2. No    |
| 4.6                                                  | Were there any consumer goods that you are interested in and were out of reach?      | 1. Yes 2. No    |
| 4.7                                                  | Did globalization influence you?                                                     | 1. Yes 2. No    |
| 4.8                                                  | Was there a demand for labor in destination areas, particularly migrant labor?       | 1. Yes 2. No    |
| 4.9                                                  | Was there any demand for commercial or transactional sex?                            | 1. Yes 2. No    |
| 4.10                                                 | Was there any promise of lucrative career?                                           | 1. Yes 2. No    |
| 4.11                                                 | Are you influenced by TV, radio, Internet to go abroad?                              | 1. Yes 2. No    |
| 4.12                                                 | Are there any societal expectations of children and women to take care of family?    | 1. Yes 2. No    |

| <b>Part V Belief and trust related push factors and related issues</b> |                                                                                                                                                                 |                                                                              |
|------------------------------------------------------------------------|-----------------------------------------------------------------------------------------------------------------------------------------------------------------|------------------------------------------------------------------------------|
| <b>S. N</b>                                                            | <b>Question: Think about the time before your departure, and answer the following questions</b>                                                                 | <b>Response</b>                                                              |
| 5.1                                                                    | For you, it was impossible to do well in business by working in home-country                                                                                    | 1. Strongly disagree 3. Neutral 5. Strongly agree<br>2. Disagree 4. Agree    |
| 5.2                                                                    | It was only abroad which was possible to change and improve your life                                                                                           | 1. Strongly disagree 3. Neutral 5. Strongly agree<br>2. Disagree 4. Agree    |
| 5.3                                                                    | There were no or little opportunities like getting credit to use as a working capital at home and thus it was better to go abroad                               | 1. Strongly disagree 3. Neutral 5. Strongly agree<br>2. Disagree 4. Agree    |
| 5.4                                                                    | With no or little additional money, what you paid to traffickers could be sufficient to be a working capital here in the country*                               | 1. Strongly disagree 3. Neutral 5. Strongly disagree<br>2. Disagree 4. Agree |
| 5.5                                                                    | Opportunities from abroad were much greater than possible risks during trafficking/traveling                                                                    | 1. Strongly disagree 3. Neutral 5. Strongly disagree<br>2. Disagree 4. Agree |
| 5.6                                                                    | If it was a must to go abroad, there were means available to leave safely*                                                                                      | 1. Strongly disagree 3. Neutral 5. Strongly disagree<br>2. Disagree 4. Agree |
| 5.7                                                                    | The mode of traveling you preferred could enable you to get job abroad without any complications                                                                | 1. Strongly disagree 3. Neutral 5. Strongly disagree<br>2. Disagree 4. Agree |
| 5.8                                                                    | Instead of being wealthy here in Ethiopia after many years of effort, it is better to go abroad facing any type of challenge during traveling or on destination | 1. Strongly disagree 3. Neutral 5. Strongly disagree<br>2. Disagree 4. Agree |
| 5.9                                                                    | Medias exaggerate risks and complications during traveling than possible opportunities abroad                                                                   | 1. Strongly disagree 3. Neutral 5. Strongly disagree<br>2. Disagree 4. Agree |
| 5.10                                                                   | Instead of broadcasting the success stories abroad, medias communicate the failure ones                                                                         | 1. Strongly disagree 3. Neutral 5. Strongly disagree<br>2. Disagree 4. Agree |
| 5.11                                                                   | Believe that Ethiopian residents who have a closer relative living abroad lead a better life than people without them                                           | 1. Strongly disagree 3. Neutral 5. Strongly disagree<br>2. Disagree 4. Agree |

\*The scores are reversed for these items during analysis
